# Supplementary material for: Substantial heritable variation for susceptibility to Dothistroma septosporum within populations of native British Scots pine (Pinus sylvestris)
Source: PubMed Central journal article supplement (PMC4984854; doi:10.1111/ppa.12528), 2016-04-04

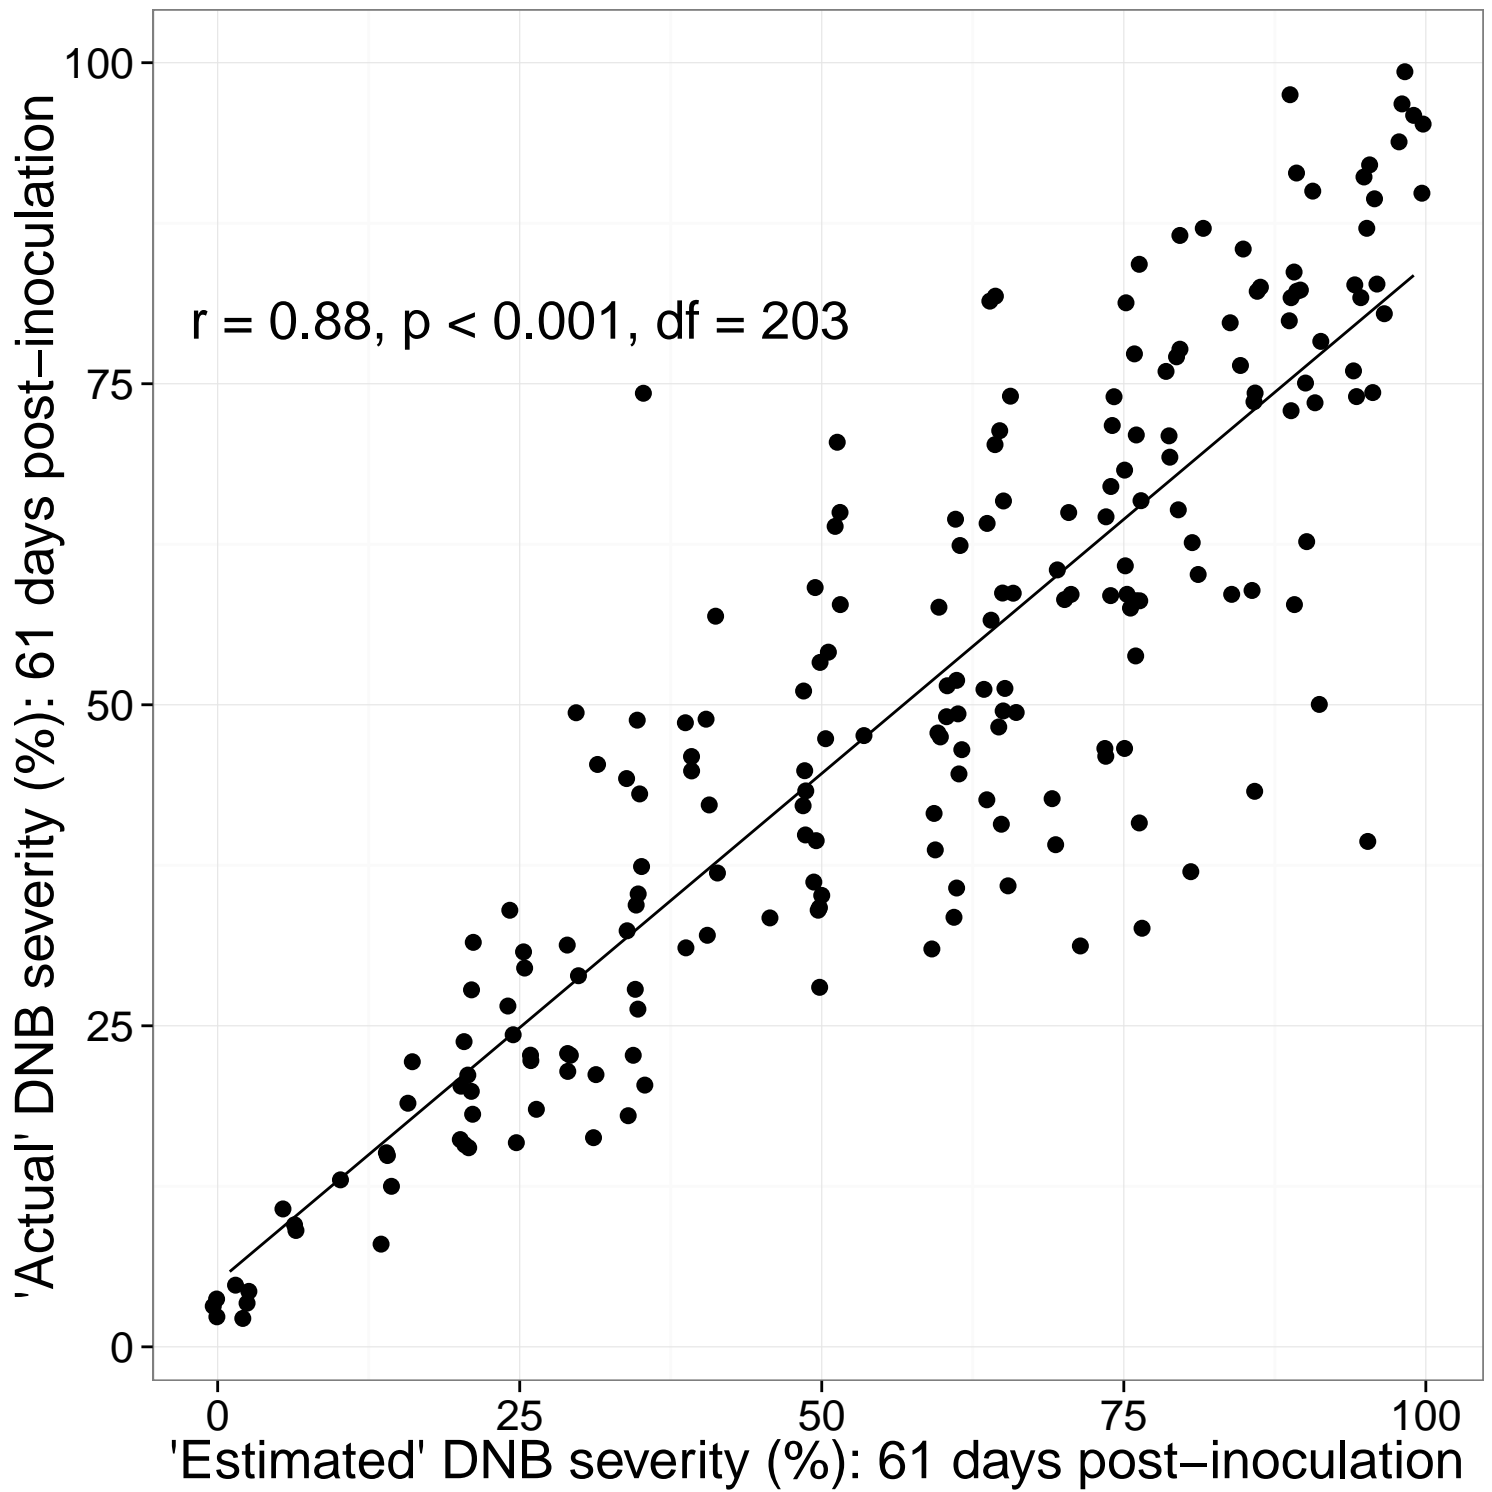

Supplement: PPA-65-987-s001.pdf [file PPA-65-987-s001.pdf]
